# Supplementary material
Source: MDPI journal article supplement (https://www.mdpi.com/2073-4395/13/4/1009)
Supplement: s1 [file s1]

## Supplementary Material Figure S1 and Tables S1~S4

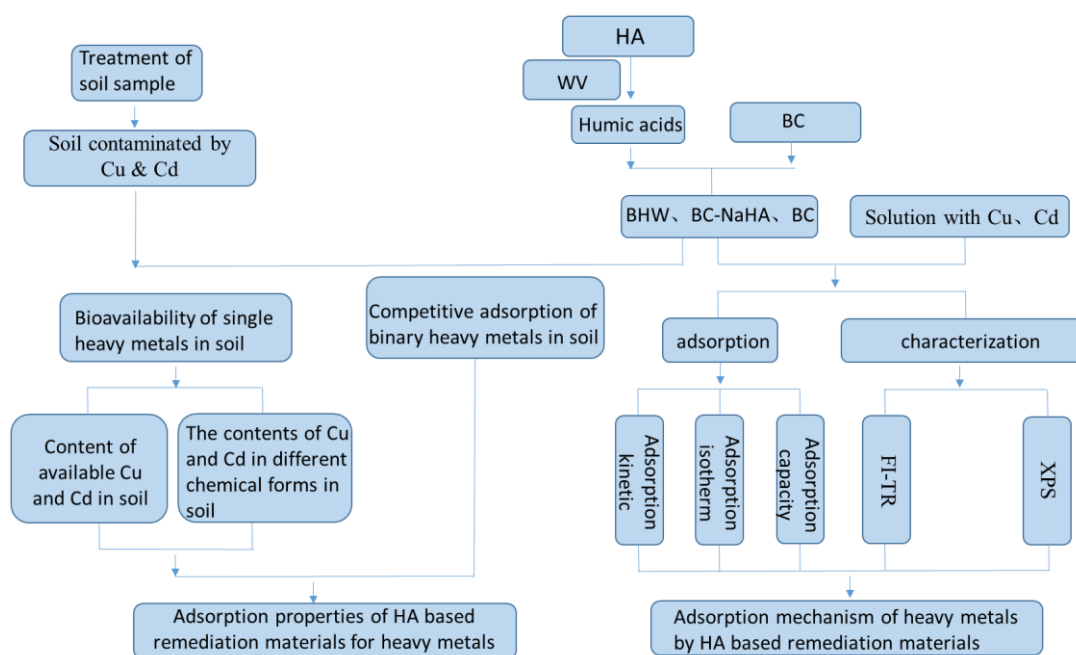

**Figure S1.** The diagram for the experiment route.

**Table S1** The chemical and physical properties of experimental soil.

| Items   | clay  | silt   | sand   | pH        | TOC           | CEC                   |       | P <sub>tot</sub> |   | K <sub>tot</sub> |   | Mg <sub>tot</sub> |   | Ca <sub>tot</sub> |  | Nitot     |
|---------|-------|--------|--------|-----------|---------------|-----------------------|-------|------------------|---|------------------|---|-------------------|---|-------------------|--|-----------|
| Content | 5.9 % | 48.3 % | 46.2 % | 6.5 ± 0.1 | 4.20 ± 0.00 % | 180                   | ± 3.2 | 0.02             | ± | 0.25             | ± | 0.12              | ± | 0.14±             |  | 201.3 ±18 |
|         |       |        |        |           |               | mmol·kg <sup>-1</sup> |       | 0.00 %           |   | 0.00 %           |   | 0.00 %            |   | 0.01 %            |  | mg·kg     |

**Table S2 The information of chemicals in the research.**

| Items                       | Specification | Producer                                               | Remarks                      |
|-----------------------------|---------------|--------------------------------------------------------|------------------------------|
| BC                          | 300um         | Kejing Technology (Hefei, China)                       | A crop straw powder          |
| sodium humate               | pH=9.98       | Yushuo Chemical Technology (Jinan, China)              |                              |
| wood vinegar                | 34wt%,pH=3.96 | Yushuo Chemical Technology (Jinan, China)              |                              |
| ultrapure water             | 18MΩ          | Acquired from a Milli-Q pure water instrument          | Used in the all experiments. |
| copper nitrate              | AR            | Shanghai Aladdin Bio-Chem Technology (Shanghai, China) |                              |
| cadmium nitrate             | AR            |                                                        |                              |
| calcium chloride            | AR            |                                                        |                              |
| ammonium acetate            | AR            |                                                        |                              |
| nitric acid                 | AR            |                                                        |                              |
| acetic acid                 | AR            | Kemiou Chemical Reagent (Tianjin, China)               |                              |
| hydrofluoric acid           | AR            |                                                        |                              |
| perchloric acid             | AR            |                                                        |                              |
| hydroxylamine hydrochloride | AR            | Alfa Aesar Chemical Reagent Co., Ltd (Shanghai, China) |                              |
| hydrogen peroxide           | 30wt%         | Alfa Aesar Chemical Reagent Co., Ltd (Shanghai, China) |                              |

**Table S3** The material composition of each group<sup>a</sup>.

| Remediation materials | NaHA (wt%)  | WV(wt%)    | BC(wt%)    |
|-----------------------|-------------|------------|------------|
| BHW                   | 28.6 (±0.5) | 28.6(±0.5) | 42.8(±0.6) |
| BC-NaHA               | 57.2(±1.2)  | 0          | 42.8(±0.7) |
| BC                    | 0           | 0          | 100(±1.5)  |

<sup>a</sup>Mean (standard deviation,  $n=3$ ) of three percentages of constituent data (three replicates) for each materials.

**Table S4** BCR sequential extraction process for Cu and Cd of soil samples

| Step | Fraction              | Extraction agent                                                            | Reaction conditions                         |
|------|-----------------------|-----------------------------------------------------------------------------|---------------------------------------------|
| 1    | Exchangeable fraction | 0.11M CH <sub>3</sub> COOH                                                  | 16h, 25°C                                   |
| 2    | Reducible fraction    | 0.1M NH <sub>4</sub> OH·HCl                                                 | 16h, 25°C                                   |
| 3    | Oxidizable fraction   | 8.8M H <sub>2</sub> O <sub>2</sub><br>1M CH <sub>3</sub> COONH <sub>4</sub> | 85°C for 1h and room temperature<br>for 16h |
| 4    | Residual fraction     | HNO <sub>3</sub> :HClO <sub>4</sub> :HF=6:2:2(v/v)                          | under microwave digestion                   |
